# Supplementary material
Source: Springer Nature journal article supplement (https://www.springermedizin.de/resource/supplementary/12993_2010_327_MOESM2_ESM.pdf/9617546)

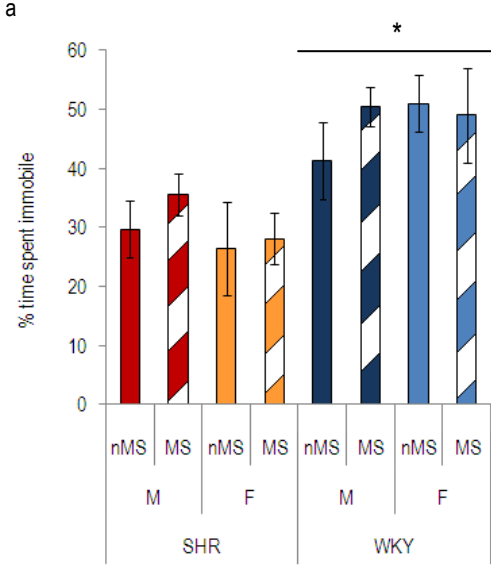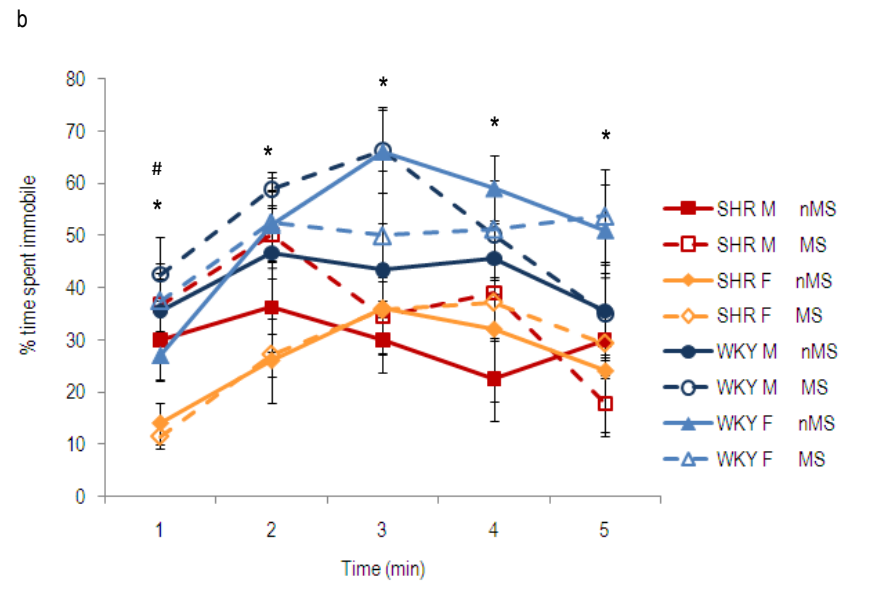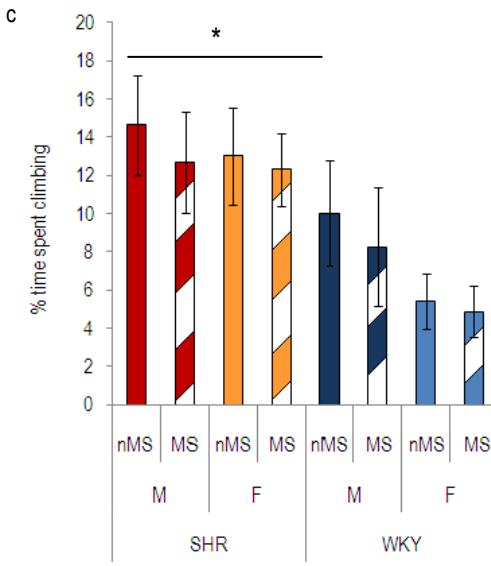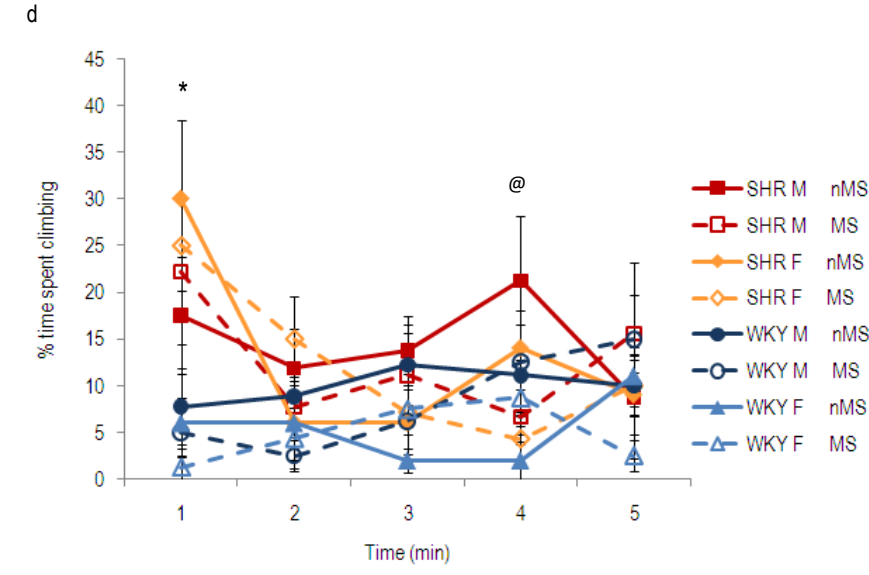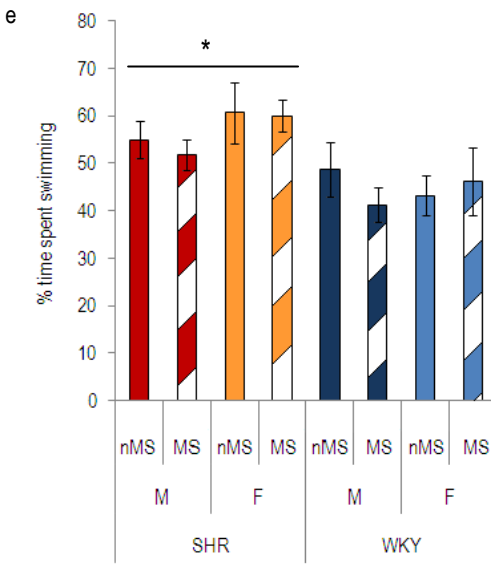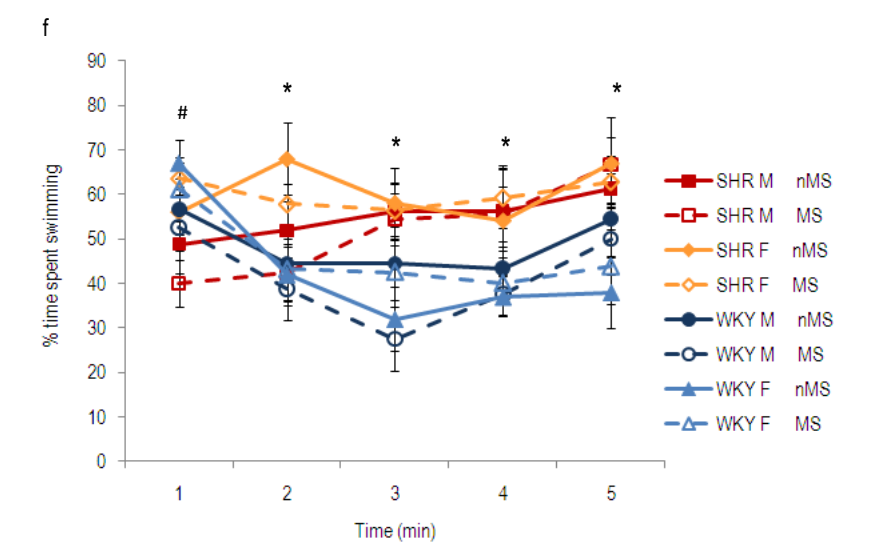

Supplement: MOESM2 [file 9617546]
